# Supplementary material for: Effect of slightly elevated progesterone on HCG trigger day on pregnancy outcomes of fresh single blastocyst transfer cycles under an early follicular phase prolonged protocol cycle
Source: Research Square preprint supplement (doi:10.21203/rs.3.rs-1808174/v1), 2022-07-13
Supplement: Supplementary file 1 [file 6c9c42442bbe5edd5ebb2cba.pdf]

Table5. comparison of logistic regression analysis focused on pregnancy outcomes under different levels of progesterone

| Pregnancy outcomes       | P value | adjusted odds ratio | 95% CI |       |
|--------------------------|---------|---------------------|--------|-------|
| clinical pregnancy rates | 0.009   | 0.52                | 0.318  | 0.849 |
| live birth rates         | 0.030   | 0.583               | 0.358  | 0.949 |
